# Supplementary material for: Defect-assisted dynamic multicolor modulation in KLu3F10:Tb crystals for anti-counterfeiting
Source: Royal Society of Chemistry journal article supplement (doi:10.1039/d2nr07264e), 2023-01-01
Supplement: d2nr07264e1.pdf [file d2nr07264e1.pdf]

# Defect-assisted dynamic multicolor modulation in KLu<sub>3</sub>F<sub>10</sub>: Tb crystals for anti-counterfeiting

Jianfeng Yang,<sup>a</sup> Yiheng Ping,<sup>a</sup> Hongping Ma<sup>\*a</sup> and Lei Lei<sup>\*b</sup>

- a. School of Mechanical and Energy Engineering, Zhejiang University of Science and Technology, Hangzhou 310023, China.  
b. College of Optical and Electronic technology, China Jiliang University, Hangzhou 310018, China.

\*E-mail: hongpingma@163.com, leilei@cjlu.edu.cn

## Fluorescence life

Tri-exponential fitting can be used to analyze these lifetime decay curves well.

$$I(t) = \sum_{i=1}^3 A_i \exp(-t/\tau_i)$$

Where  $I$  is the luminous intensity at time  $t$ ,  $\tau_i$  represents the fluorescence lifetime of individual components with  $A_i$  as their relative weightage. The average lifetime  $\tau_{av}$  is evaluated by the following formula:

$$\tau_{av} = \frac{A_1\tau_1^2 + A_2\tau_2^2 + A_3\tau_3^2}{A_1\tau_1 + A_2\tau_2 + A_3\tau_3}$$

Fig. S1-S4

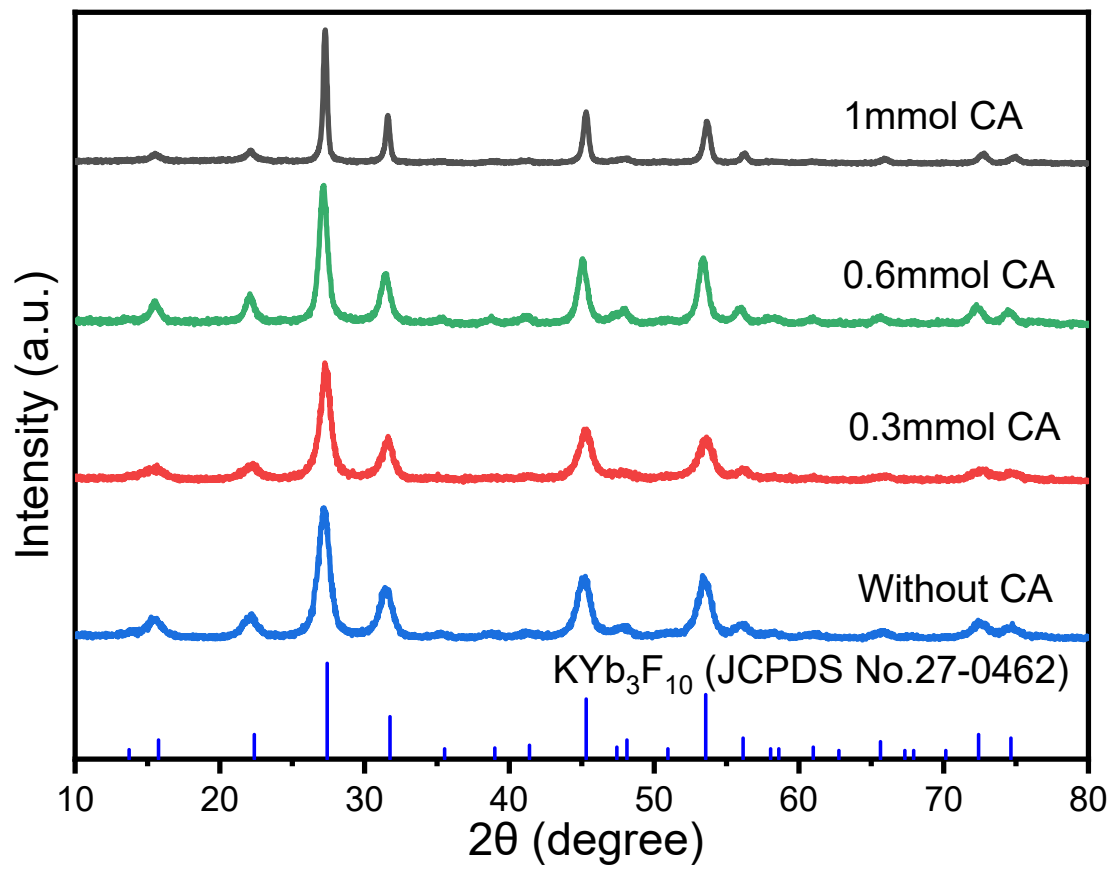

**Fig. S1.** XRD patterns of the  $\text{KLu}_3\text{F}_{10}: 15\text{Tb}$  using different molar amounts of citric acid.

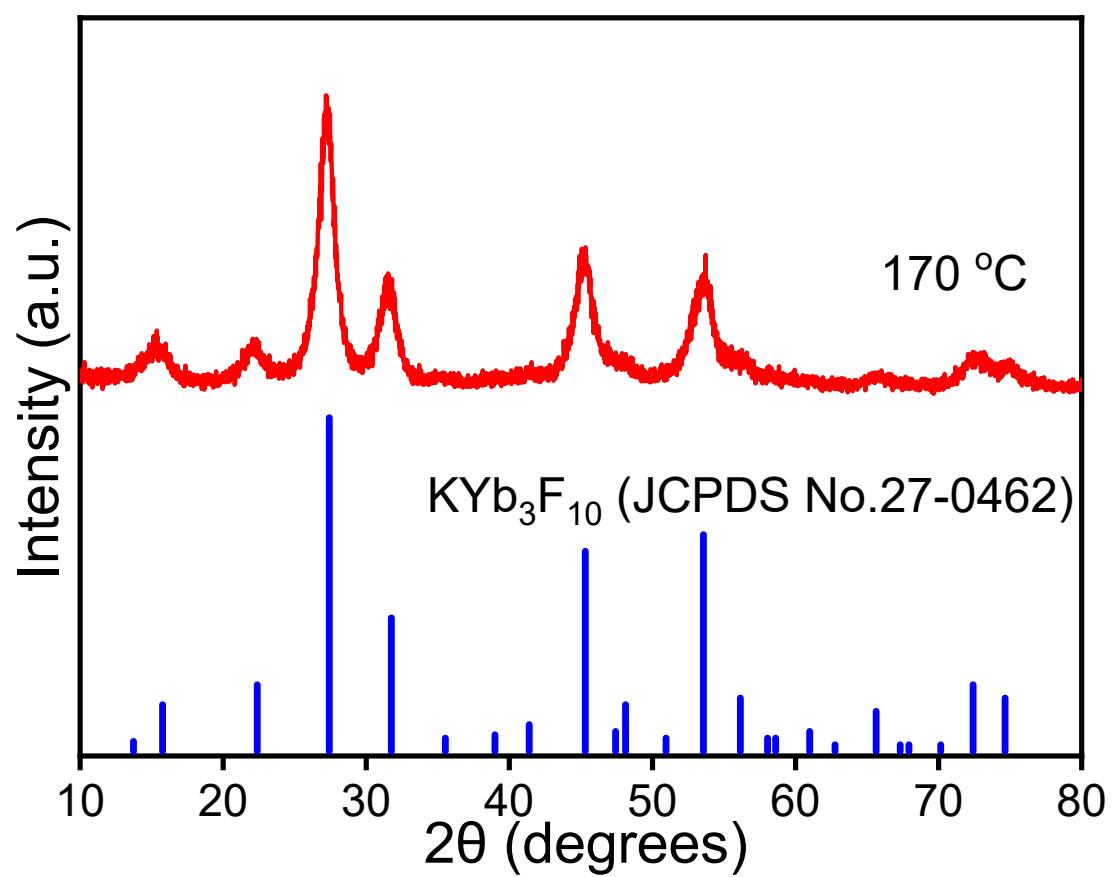

**Fig. S2.** XRD pattern of the  $\text{KLu}_3\text{F}_{10}:15\text{Tb}$  synthesized at 170°C hydrothermal reaction temperature.

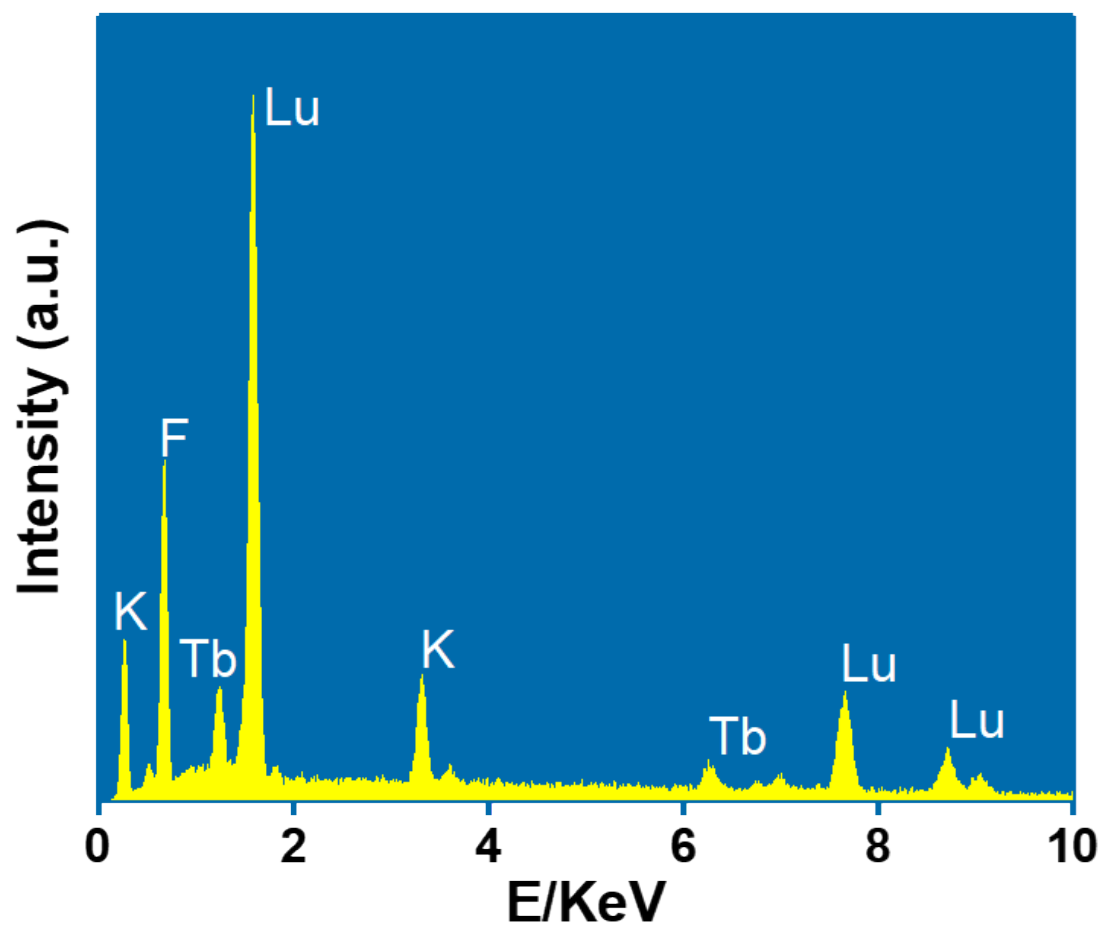

Fig. S3. EDX spectra of the  $\text{KLu}_3\text{F}_{10}:15\text{Tb}$ .

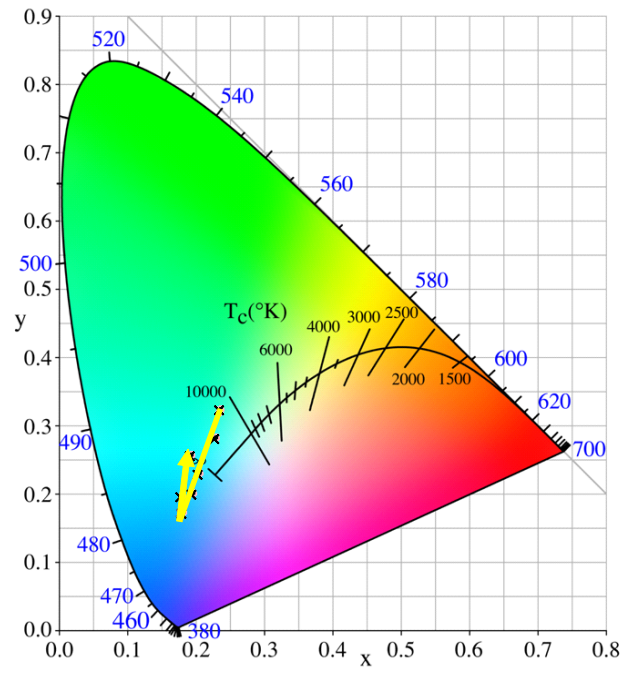

**Fig. S4.** CIE chromaticity diagram of the  $\text{KLu}_3\text{F}_{10}: 15\text{Tb}$  under UV excitation at 250 nm - 370 nm.
